# Supplementary material for: Proteomics Analysis of Monocyte-Derived Hepatocyte-Like Cells Identifies Integrin Beta 3 as a Specific Biomarker for Drug-Induced Liver Injury by Diclofenac
Source: PubMed Central journal article supplement (PMC6039575; doi:10.3389/fphar.2018.00699), 2018-07-04
Supplement: Data_Sheet_1.pdf [file Data_Sheet_1.pdf]

| Diagnosis                    | iDILI                       |                                 |          | other ALI            |            |                 |
|------------------------------|-----------------------------|---------------------------------|----------|----------------------|------------|-----------------|
| Causality likelihood         | definite                    | highly likely                   |          | probable             | possible   | unlikely        |
| Other causes of liver injury | excluded                    | excluded                        |          | unlikely             | probable   | highly probable |
| Drug signature               | typical                     | typical                         | atypical | atypical             | compatible | atypical        |
| Co-medication                | none                        | compatible signature            | none     | compatible signature | any        | any             |
| Re-challenge                 | positive with single agent* | positive with multiple agents** |          | not done             | not done   | negative        |

**Supplementary Table S1:** Template for causality likelihood used for iDILI diagnosis and drug causality. For each case diagnosis was made by assessing each drug involved. The highest causality likelihood equals the case likelihood and therefore diagnosis of iDILI or other ALI (acute liver injury). \*positive re-challenge with a single agent proved the respective drug as definite. \*\*Positive re-challenge with multiple drugs resulted in “highly likely” for the drugs with positive re-challenge.

| characteristics                 | DicloDILI    | Diclo_tolerator | Diclo_otherDILI | Diclo_otherALI | Control_healthy | Control_otherDILI | Control_otherALI | P DicloDILI vs other groups |
|---------------------------------|--------------|-----------------|-----------------|----------------|-----------------|-------------------|------------------|-----------------------------|
| total N                         | 4            | 3               | 2               | 3              | 3               | 4                 | 3                | -                           |
| female N                        | 1            | 2               | 0               | 0              | 1               | 3                 | 1                | 0,535                       |
| female%                         | 0,25         | 0,67            | 0               | 0              | 0,33            | 0,75              | 0,33             | -                           |
| caucasian N                     | 3            | 3               | 2               | 2              | 3               | 4                 | 3                | 0,338                       |
| caucasian%                      | 0,75         | 1               | 1               | 0,67           | 1               | 1                 | 1                | -                           |
| Age (Median/Range)              | 52,5 (15-59) | 37 (29-40)      | 38,5 (35-42)    | 39 (26-73)     | 26 (24-49)      | 68 (52-79)        | 52 (40-70)       | 0,967                       |
| Hepatocellular pattern N        | 3            | na              | 2               | 1              | na              | 2                 | 0                | 0,279                       |
| Hepatocellular%                 | 0,75         | na              | 1               | 0,33           | na              | 0,5               | 0                | -                           |
| Severity (Median/Range)         | 1,5 (1-4)    | na              | 2 (1-3)         | 2 (2-3)        | na              | 2 (1-4)           | 1 (1-2)          | 0,862                       |
| Acute liver failure N           | 1            | na              | 1               | 1              | na              | 1                 | 0                | 0,603                       |
| Acute liver failure%            | 0,25         | na              | 0,5             | 0,33           | na              | 0,25              | 0                | -                           |
| RUCAM Diclo (Median/Range)      | 8 (7-9)      | na              | 4,5 (4-5)       | 4 (-1-4)       | na              | na                | na               | 0,016*                      |
| RUCAM other drug (Median/Range) | 6,5 (5-8)    | na              | 7,5 (7-8)       | 4 (-1-5)       | na              | 6,5 (6-7)         | 5 (2-5)          | 0,379                       |
| MH positive Diclo               | 4            | na              | 0               | 0              | na              | 0                 | 0                | -                           |
| MH positive other drug          | 0            | na              | 2               | 0              | na              | 4                 | 0                | -                           |

**Supplementary Table S2:** Characteristics of study subjects and, where applicable detail on liver injury. Severity was scored as described in Ref. 15. \*p<0.05 vs all other groups.

| Subject ID         | RUCAM Diclo | other drug               | RUCAM other drug | Group based on causality assessment (ALI diagnosis)        | Investigations leading to diagnosis                                                          | Underlying disease (drug indication)                            | gender | age | ethnicity | severity | pattern         | acute liver failure | latency (days)                    | dose (mg)                           |
|--------------------|-------------|--------------------------|------------------|------------------------------------------------------------|----------------------------------------------------------------------------------------------|-----------------------------------------------------------------|--------|-----|-----------|----------|-----------------|---------------------|-----------------------------------|-------------------------------------|
| DicloDILI1         | 8           | progesterone             | 5                | DicloDILI                                                  | Exclusion of other causes, Diclofenac with compatible time to onset and pattern              | none (headache)                                                 | female | 50  | hispanic  | 4        | Hepato-cellular | yes                 | 87                                | 150                                 |
| DicloDILI2         | 9           | Phenprocoumon            | 8                | DicloDILI                                                  | Exclusion of other causes, Diclofenac with compatible time to onset and pattern              | arterial hypertension (back pain)                               | male   | 59  | caucasian | 2        | Hepato-cellular | no                  | 32                                | 150                                 |
| DicloDILI3         | 8           | Pantoprazole             | 8                | DicloDILI                                                  | Exclusion of other causes, Diclofenac with compatible time to onset and pattern              | none (dicus prolaps)                                            | male   | 55  | caucasian | 1        | Hepato-cellular | no                  | 68                                | 150                                 |
| DicloDILI4         | 7           | Cefaclor                 | 5                | DicloDILI                                                  | Exclusion of other causes, Diclofenac with compatible time to onset and pattern              | heart insufficiency due to perinatal myocarditis (flu symptoms) | male   | 15  | caucasian | 1        | Chole-static    | no                  | 7                                 | 75                                  |
| Diclo_tolerator1   | N/A         | N/A                      | N/A              | Diclo_tolerator                                            | N/A                                                                                          | N/A                                                             | male   | 37  | caucasian | N/A      | N/A             | N/A                 | N/A                               | N/A                                 |
| Diclo_tolerator2   | N/A         | N/A                      | N/A              | Diclo_tolerator                                            | N/A                                                                                          | N/A                                                             | female | 40  | caucasian | N/A      | N/A             | N/A                 | N/A                               | N/A                                 |
| Diclo_tolerator3   | N/A         | N/A                      | N/A              | Diclo_tolerator                                            | N/A                                                                                          | N/A                                                             | female | 29  | caucasian | N/A      | N/A             | N/A                 | N/A                               | N/A                                 |
| Diclo_otherDILI1   | 4           | Carbamazole              | 7                | Diclo_otherDILI                                            | Exclusion of other causes, Carbamazole with compatible time to onset and pattern             | subarachnoid hemorrhage (hyperthyreosis)                        | male   | 42  | caucasian | 1        | Hepato-cellular | no                  | 19 (Carbamazole); 1 (Diclofenac)  | 10 (Carbamazole); 150 (Diclofenac)  |
| Diclo_otherDILI2   | 5           | Metamizole               | 8                | Diclo_otherDILI                                            | Exclusion of other causes, Metamizole with compatible time to onset and pattern              | impingement syndrom (post shoulder surgery)                     | male   | 35  | caucasian | 3        | Hepato-cellular | yes                 | 68 (Metamizole); 311 (Diclofenac) | 1500 (Metamizole); 150 (Diclofenac) |
| Diclo_otherALI1    | 4           | Ciprofloxacin            | 4                | Diclo_otherALI (Adult Still's Disease)                     | Laboratory, symptoms, serology                                                               | none (arthralgias, fever)                                       | male   | 73  | caucasian | 2        | Chole-static    | no                  | 10 (Diclofenac)                   | 150 (Diclofenac)                    |
| Diclo_otherALI2    | -1          | Amoxicillin /Clavulanate | -1               | Diclo_otherALI (acute Hepatitis A)                         | Serology, viral load                                                                         | none (fever, abdominal pain)                                    | male   | 26  | arabic    | 3        | Hepato-cellular | yes                 | 23 (Diclofenac)                   | 150 (Diclofenac)                    |
| Diclo_otherALI3    | 4           | Metamizole               | 5                | Diclo_otherALI (Benign recurrent intrahepatic cholestasis) | History, genetics                                                                            | cutaneous abscess post surgery                                  | male   | 39  | caucasian | 2        | Chole-static    | no                  | 21 (Diclofenac)                   | 150 (Diclofenac)                    |
| Control_healthy1   | N/A         | N/A                      | N/A              | Control_healthy                                            | N/A                                                                                          | N/A                                                             | male   | 26  | caucasian | N/A      | N/A             | N/A                 | N/A                               | N/A                                 |
| Control_healthy2   | N/A         | N/A                      | N/A              | Control_healthy                                            | N/A                                                                                          | N/A                                                             | male   | 24  | caucasian | N/A      | N/A             | N/A                 | N/A                               | N/A                                 |
| Control_healthy3   | N/A         | N/A                      | N/A              | Control_healthy                                            | N/A                                                                                          | N/A                                                             | female | 49  | caucasian | N/A      | N/A             | N/A                 | N/A                               | N/A                                 |
| Control_otherDILI1 | N/A         | Dabigatran               | 6                | Control_otherDILI                                          | Exclusion of other causes, Dabigatran with compatible time to onset and pattern              | atrial fibrillation                                             | female | 79  | caucasian | 1        | Chole-static    | no                  | 141 (Dabigatran)                  | 15 (Dabigatran)                     |
| Control_otherDILI2 | N/A         | Amoxicillin /Clavulanate | 7                | Control_otherDILI                                          | Exclusion of other causes, Amoxicillin/Clavulanate with compatible time to onset and pattern | dental surgery                                                  | female | 52  | caucasian | 2        | Chole-static    | no                  | 19 (Amox-Clav)                    | 2000 (Amox-Clav)                    |
| Control_otherDILI3 | N/A         | Pirfenidone              | 6                | Control_otherDILI                                          | Exclusion of other causes, Pirfenidone with compatible time to onset and pattern             | idiopathic pulmonary fibrosis                                   | male   | 76  | caucasian | 4        | Hepato-cellular | yes                 | 442 (Pirfenidone)                 | 800 (Pirfenidone)                   |
| Control_otherDILI4 | N/A         | Amoxicillin /Clavulanate | 7                | Control_otherDILI                                          | Exclusion of other causes, Amoxicillin/Clavulanate with compatible time to onset and pattern | restless legs (pneumonia)                                       | female | 60  | caucasian | 2        | Hepato-cellular | no                  | 5 (Amox-Clav)                     | 2000 (Amox-Clav)                    |
| Control_otherALI1  | N/A         | Amoxicillin /Clavulanate | 5                | Control_otherALI (alcohol)                                 | History, laboratory                                                                          | breast cancer (post surgery)                                    | female | 52  | caucasian | 1        | Chole-static    | no                  | 5 (Amox-Clav)                     | 3000 (Amox-Clav)                    |
| Control_otherALI2  | N/A         | Mero-penem               | 5                | Control_otherALI (secondary sclerosing cholangitis)        | Imaging, course of disease                                                                   | subarachnoid hemorrhage (post surgery)                          | male   | 70  | caucasian | 1        | Chole-static    | no                  | 25 (Mero-penem)                   | 1500 (Mero-penem)                   |
| Control_otherALI3  | N/A         | Moxifloxacin             | 2                | Control_otherALI (Vasculitis)                              | Serology, clinical symptoms, organ involvement                                               | Vasculitis (Fever and malaise)                                  | male   | 40  | caucasian | 2        | Chole-static    | no                  | 3 (Moxifloxacin)                  | 400 (Moxifloxacin)                  |

**Supplementary Table S3:** Details on study subject diagnosis, comorbidities and comedications.

| Name                                         | No. of proteins | Enrichment | P-value |
|----------------------------------------------|-----------------|------------|---------|
| Spliceosome                                  | 25              | 1,9        | 0,0003  |
| Protein processing in endoplasmic reticulum  | 19              | 1,4        | 0,0385  |
| Antigen processing and presentation          | 9               | 1,7        | 0,0366  |
| Cell adhesion molecules (CAMs)               | 8               | 1,7        | 0,0481  |
| Metabolism of xenobiotics by cytochrome P450 | 6               | 2,3        | 0,0242  |

**Supplementary Table S4:** Pathways significantly enriched in the protein cluster predominantly upregulated in DicloDILI (dotted rectangle in Fig. 2a).

| Protein name                            | Gene name | Cellular localization | Relative change in expression: Diclo vs. vehicle control |                 |                  |                 |                 |                    |                  |
|-----------------------------------------|-----------|-----------------------|----------------------------------------------------------|-----------------|------------------|-----------------|-----------------|--------------------|------------------|
|                                         |           |                       | Diclo DILI                                               | Diclo_tolerator | Diclo_other DILI | Diclo_other ALI | Control_healthy | Control_other DILI | Control_otherALI |
| Tubulin beta-1 chain                    | TUBB1     | intracellular         | 32,723                                                   | 0,446           | 0,513            | 1,222           | 0,671           | 0,782              | 0,938            |
| Fatty acyl-CoA reductase 1              | FAR1      | intracellular         | 7,800                                                    | 0,852           | 0,951            | 1,678           | 0,969           | 1,092              | 0,486            |
| Nicotinamide phosphoribosyltransferase  | NAMPT     | intracellular         | 6,974                                                    | 1,105           | 1,033            | 1,075           | 1,093           | 1,365              | 1,138            |
| EH domain-containing protein 3          | EHD3      | intracellular         | 5,713                                                    | 0,811           | 1,498            | 0,827           | 1,052           | 0,601              | 1,437            |
| GPI transamidase component PIG-T        | PIGT      | intracellular         | 5,039                                                    | 0,835           | 1,123            | 0,908           | 0,941           | 0,992              | 1,004            |
| Pseudouridine-5-monophosphatase         | HDHD1     | intracellular         | 4,790                                                    | 1,080           | 1,093            | 0,764           | 1,491           | 1,097              | 1,076            |
| Misshapen-like kinase 1                 | MINK1     | intracellular         | 4,600                                                    | 0,918           | 0,931            | 1,193           | 0,967           | 0,964              | 0,661            |
| Leukocyte elastase inhibitor            | SERPINB1  | intracellular         | 4,438                                                    | 0,964           | 0,877            | 1,001           | 1,027           | 1,066              | 1,116            |
| Integrin beta 3                         | ITGB3     | membrane              | 4,204                                                    | 1,384           | 0,684            | 0,867           | 0,622           | 1,304              | 0,730            |
| Receptor expression-enhancing protein 3 | REEP3     | intracellular         | 4,195                                                    | 1,061           | 1,070            | 1,341           | 0,849           | 0,656              | 1,042            |

**Supplementary Table S5:** List of first ten upregulated proteins in Diclofenac-treated MH cells from DicloDILI subjects, compared to vehicle control.

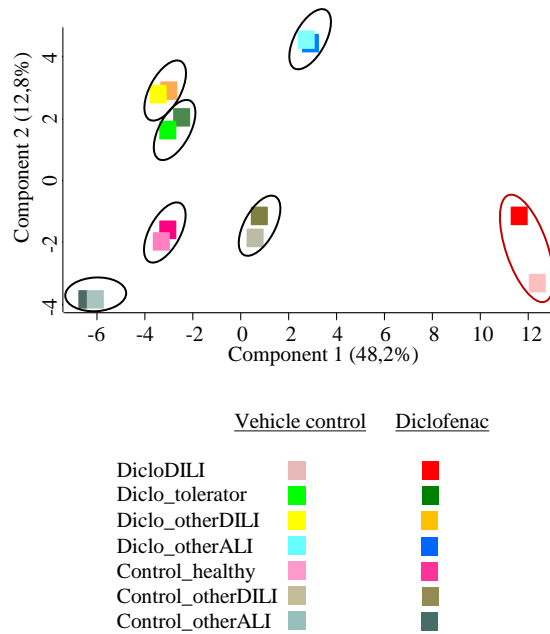

**Supplementary Figure S1:** Principal component analysis of protein expression in MH cells from the different subject groups. Circles indicate samples which belong to the same subject group and were treated with DMSO (vehicle control) or Diclofenac.

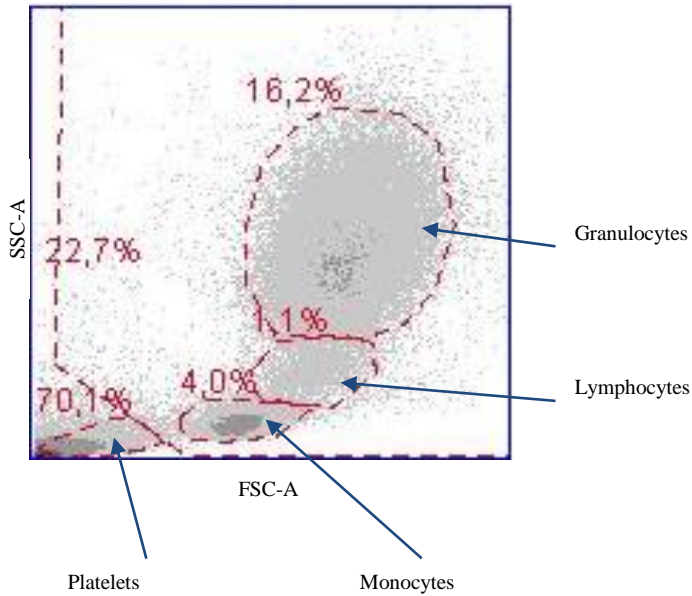

**Supplementary Figure S2:** Gating strategy for the analysis of erythrocyte-lysed whole blood by flow cytometry. Representative density plot (forward vs side scatter area), showing the different blood cell populations.

(A)

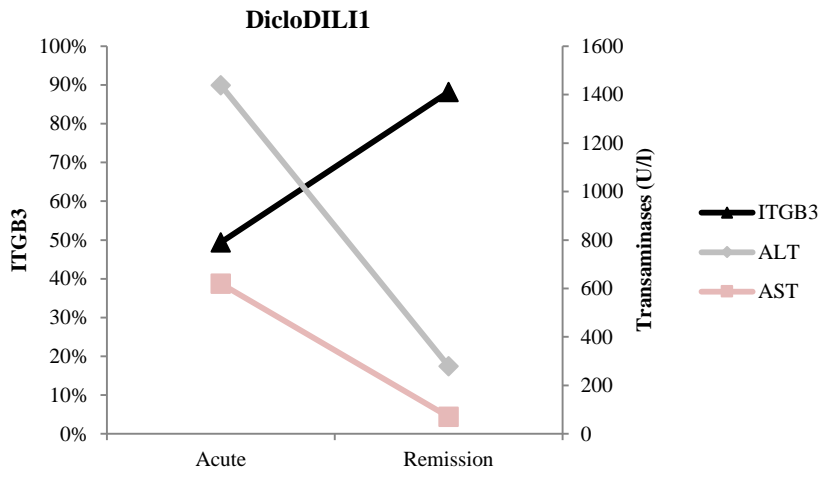

(B)

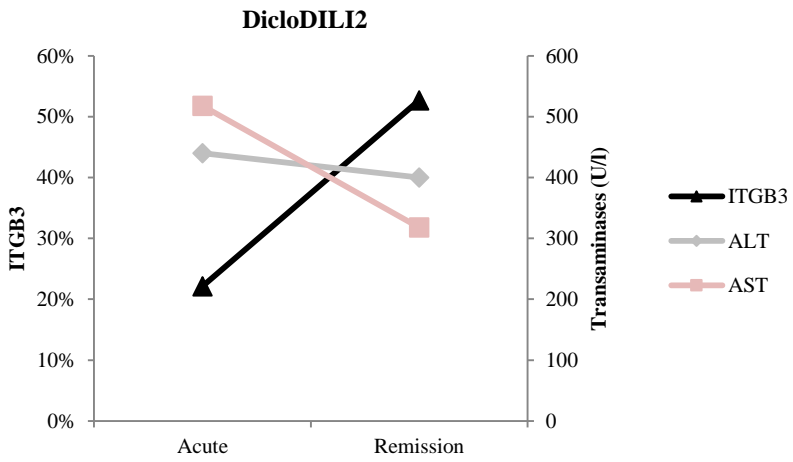

**Supplementary Figure S3:** Evolution of ITGB3 values and liver transaminases (ALT, AST) in DicloDILI1 (A) and DicloDILI2 (B) from the acute phase of the disease to remission. ITGB3 correlated inversely to ALT and AST in both subjects.
